# Supplementary material for: High-throughput sequencing reveals circular RNA hsa_circ_0000592 as a novel player in the carcinogenesis of gastric carcinoma
Source: Oxford University Press journal article supplement (doi:10.1042/bsr20181900), 2019-06-01
Supplement: bsr-2018-1900_supp.pdf [file bsr-2018-1900_supp.pdf]

**Supplementary Table S1 RNA Primer sequences**

| <b>Gene</b>      | <b>Primer Sequence</b>                                          |
|------------------|-----------------------------------------------------------------|
| hsa_circ_0000118 | Forward-TTGCAAGGAAAGGACACTCC<br>Reverse-CGTTCTTCCTCTTCCCTCCT    |
| hsa_circ_0000284 | Forward-TCGGCCAGTCATGTATCAA<br>Reverse-CCCTTAGTGGGAGGATGAGA     |
| hsa_circ_0000567 | Forward-CAAACCCTCCCCAGTGAATA<br>Reverse-TCCTTTGGTGACACAGTTGC    |
| hsa_circ_0000119 | Forward-GGAGGCCTACTTGCAGCATA<br>Reverse-GCTTCTTCCAAGGCCTTCTC    |
| hsa_circ_0000847 | Forward-TATTCCAGAAACGCCACCTC<br>Reverse-TTCCATCCCAGCAGTCTCTT    |
| hsa_circ_0000117 | Forward-GGGCAAAGATGGATTGAAGA<br>Reverse-AATAGGGACTGGTGGCAGTG    |
| hsa_circ_0001829 | Forward-GTGATGTTTGGCAGGGAGTT<br>Reverse-TGGCTTGCTGGTTTACTGTG    |
| hsa_circ_0002484 | Forward- AAGTGTCCCAGCCTGTCACT<br>Reverse- AGCTTTCCAAGCATTTCTG   |
| hsa_circ_0000620 | Forward- CTGAATGCCAATGTGTGGTC<br>Reverse- CTATCAAGGCCCGATTTTTG  |
| hsa_circ_0000592 | Forward- CATGCAGTTGATGGGACAAC<br>Reverse- TGAAGCTTCCGTTCTGGTCT  |
| hsa_circ_0003221 | Forward- GGGGCAATGCACTAGAAAAG<br>Reverse- CCAGGTGGTTGGCTCACTAT  |
| hsa_circ_0000268 | Forward- TTGGCTCTTCCCTCAATGCTT<br>Reverse- TCTTTGGGCACGACACATAG |
| hsa_circ_0074990 | Forward- ATCTTCGAGGGATTGCCTTT<br>Reverse- GACACCTGAAGTCGCTGAGA  |
| hsa_circ_0004594 | Forward- GCGAGAAGCTCACCTTCAAC<br>Reverse- CCAGAAGACCACCTTCTCCA  |
| hsa_circ_0004873 | Forward- ATGGTGACCTGGCTAACTGG<br>Reverse- CTTCCCATCTCCCTCTTTC   |
| GAPDH            | Forward-CAATGACCCCTTCATTGACC<br>Reverse-GACAAGCTTCCCGTTCTCAG    |
| U6               | Forward -CTCGCTTCGGCAGCACA<br>Reverse-AACGCTTCACGAATTTGCGT      |

**Supplementary Table S2 siRNA sequences**

| siRNA                  | sequences                                                               |
|------------------------|-------------------------------------------------------------------------|
| si-hsa_circ_0000592-1  | sense 5'-AAUAAGACUUCUUGAAGAC-3',<br>antisense 5'-GUCUUCAAGAAGUCUUUU-3'  |
| si-hsa_circ_0000592-2  | sense 5'-AGAAGUCUUUUUGCCAGCA-3',<br>antisense 5'-UGCUGGCAAUAAGACUUCU-3' |
| negative control siRNA | sense 5'-UUCUCCGAACGUGUCACGU-3',<br>antisense 5'-ACGUGACACGUUCGGAGAA-3' |

**Supplementary Table S3**

| circRNA hsa_circ_0000592 | oligonucleotide probe sequence                                                                                                                                                                                                                                                                                                                                                                                                                                                                                                                                                                                                                                                                                                                                                                                                                                                                                                                                                                                                                                                                                                                                                                                                                                       |
|--------------------------|----------------------------------------------------------------------------------------------------------------------------------------------------------------------------------------------------------------------------------------------------------------------------------------------------------------------------------------------------------------------------------------------------------------------------------------------------------------------------------------------------------------------------------------------------------------------------------------------------------------------------------------------------------------------------------------------------------------------------------------------------------------------------------------------------------------------------------------------------------------------------------------------------------------------------------------------------------------------------------------------------------------------------------------------------------------------------------------------------------------------------------------------------------------------------------------------------------------------------------------------------------------------|
|                          | TCTTATTGCCAGCAGTTTTGAAGATGACTCCCCTGTAGCCTCA<br>CCGTTAGACCAGAACGGAAGCTTCAATGTTGTTATTAAGAG<br>GAACCTCTAGATGATTATGACTACGAACTTGGTGAGTGCCCAG<br>AAGGGTCACTGTGAAACAGGAAGAGACAGATGAAGAGACG<br>GATGTATACTCAAACAGTGATGATGATCCTATACTAGAGAAAC<br>AGCTAAAGAGGCACAATAAAGTTGACAACCCAGAAGCTGAC<br>CATCTATCTTCTAAATGGCTTCCAAGCAGCCATCAGGTGTTG<br>CTAAAGCTAAAATGTTCAAATTAGACACTGGAAAGATGCCAGT<br>AGTCTATCTGGAGCCCTGTGCTGTCACCAGAAGCACAGTTAA<br>GATTTCTGAACTCCCCGATAACATGCTTCCACATCTCGAAAG<br>GATAAATCTTCTATGTTGGCAGAATTGGAATATTTGCCTACATA<br>CATTGAAAATCCAATGAGACTGCCTTCTGCTTAGGCAAGGAA<br>TCAGAAAATGGTCTTAGAAAACATTCACCAGATCTCAGAGTG<br>GTACAAAAATATCCCTTACTGAAAGAGCCTCAGTGGAATATC<br>CTGATATATCTGACAGCATTAGCACAGAAAGAATACTCGACGA<br>TTCAAAGGATTCAGTTGGAGACTCACTTTCAGGAAAAGAGGA<br>CTTGGGCAGAAAGAGAACAACACTATGCTTAAGATTGCAACAGC<br>CGCAAAGGTAGTGAATGCTAATCAGAATGCCTCTCCAAATGTC<br>CCTGGAAAAAGAGGAAGGCCACGAAAATTGAACTCTGTAA<br>GGCAGGACGACCACCTAAGAACACAGGAAAGTCTTTAATTTT<br>TACAAAGAATACACCTGTAAGCCCTGGGAGTACCTTTCAGAT<br>GTGAAGCCTGATCTGGAAGATGTGGATGGTGTCTCTTTGTTT<br>CCTTTGAATCAAAGGAAGCTCTAGACATTCATGCAGTTGATGG<br>GACAACAGAAGAATCTTCTAGTCTCCAGGCATCAACCACAAA<br>TGAATCAGGTTACAGAGCAAGAATTTCCAGTTGGAAAAGGA<br>ATTGATAGAAGATTTGAAGACTTTGCGGCACAAGCAGGTGAT<br>ACATCCTGGTCTTCAAGAAG |
